# Supplementary material for: The seasonal origins and ages of water provisioning streams and trees in a tropical montane cloud forest
Source: Copernicus journal article supplement (doi:10.5194/hess-27-4173-2023), 2023-11-21
Supplement: Supplementary file 1 [file hess-27-4173-2023-supplement.pdf]

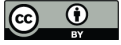

*Supplement of*

## **The seasonal origins and ages of water provisioning streams and trees in a tropical montane cloud forest**

**Emily I. Burt et al.**

*Correspondence to:* Emily I. Burt ([emburt@chapman.edu](mailto:emburt@chapman.edu))

The copyright of individual parts of the supplement might differ from the article licence.

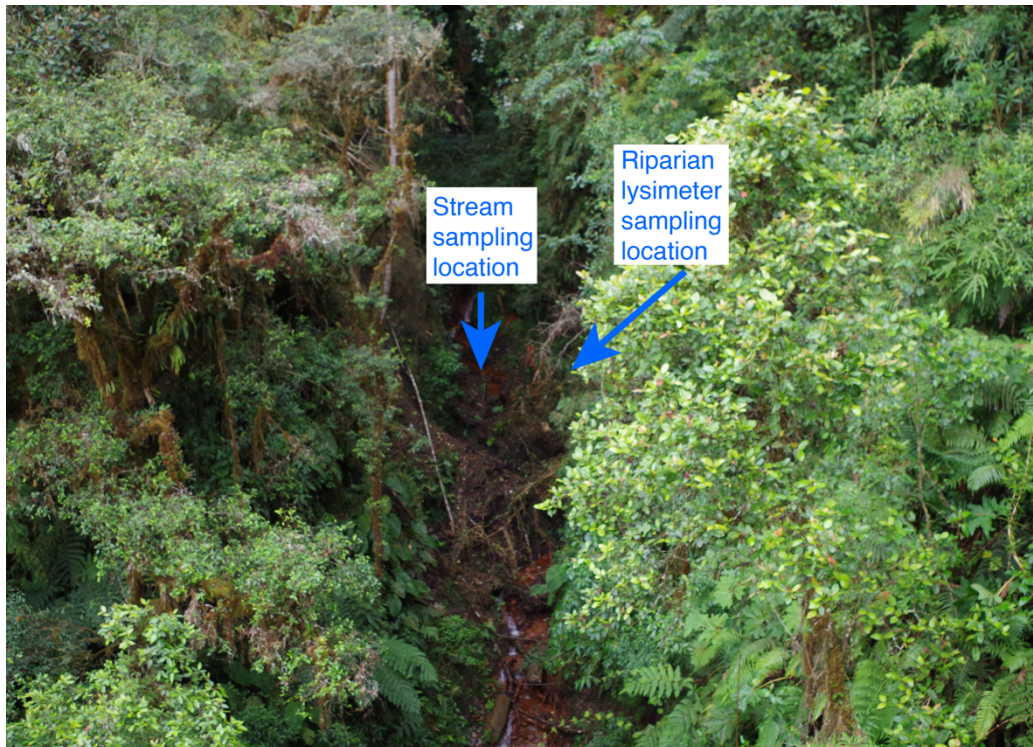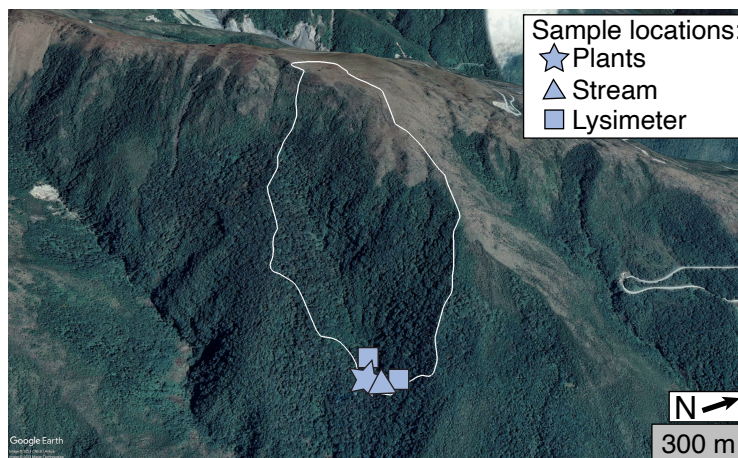

**Figure S1.** Top: A view of the sampling site in a tropical montane cloud forested watershed in the southeastern Peruvian Andes mountains from the middle of the canopy bridge, looking down towards the valley bottom with the stream. Bottom: Google Earth imagery of the study watershed, which is outlined in white.

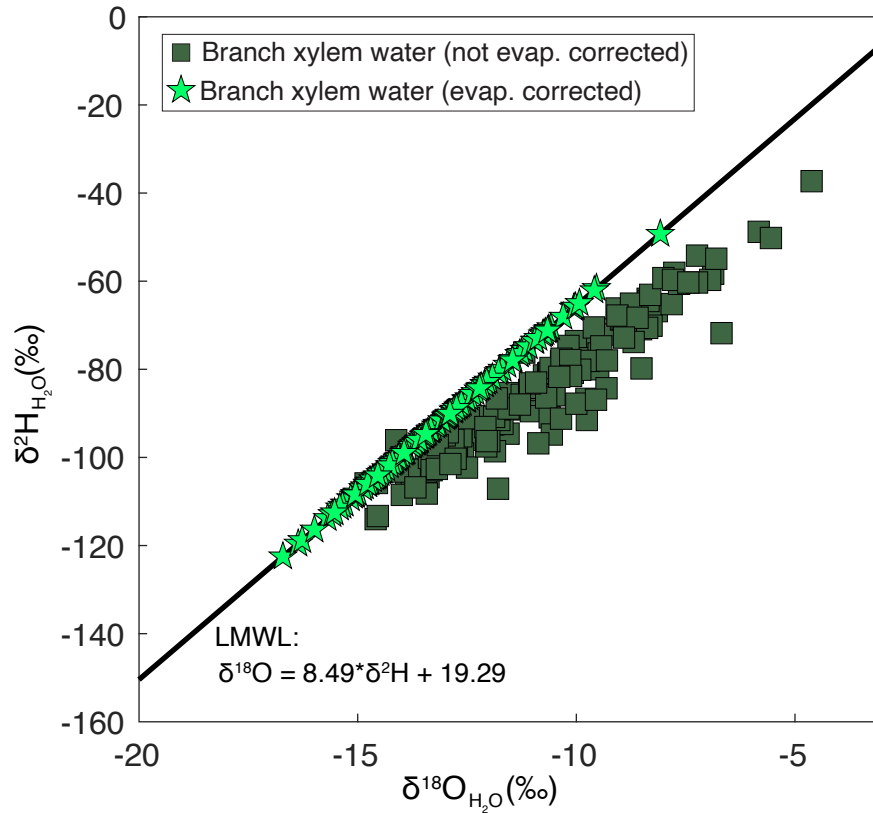

**Figure S2.** Hydrogen and oxygen isotope ratios of tree branch xylem water observed in a tropical montane cloud forested watershed in the southeastern Peruvian Andes mountains. The observed isotopic ratios are represented by dark green squares, while evaporation-corrected ratios (following Benettin et al., 2018) are represented by light green stars. LMWL indicates the local meteoric water line.

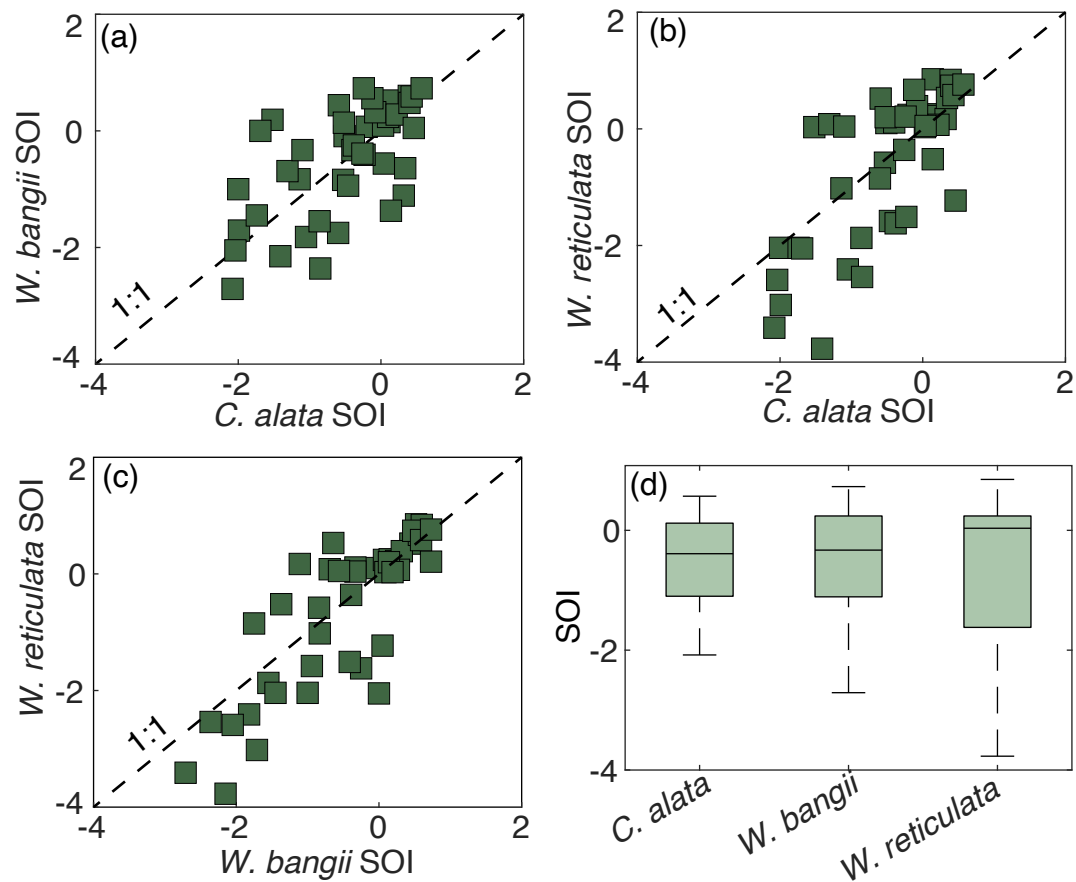

**Figure S3.** (a-c) Seasonal origin indices (SOI) for tree species sampled on the same date; each point represents a single sampling date from a tropical montane cloud forested watershed in the southeastern Peruvian Andes mountains. The dashed reference line shows a 1:1 relationship between the SOI of different species. (d) Distributions of seasonal origin indices for the 3 sampled tree species.

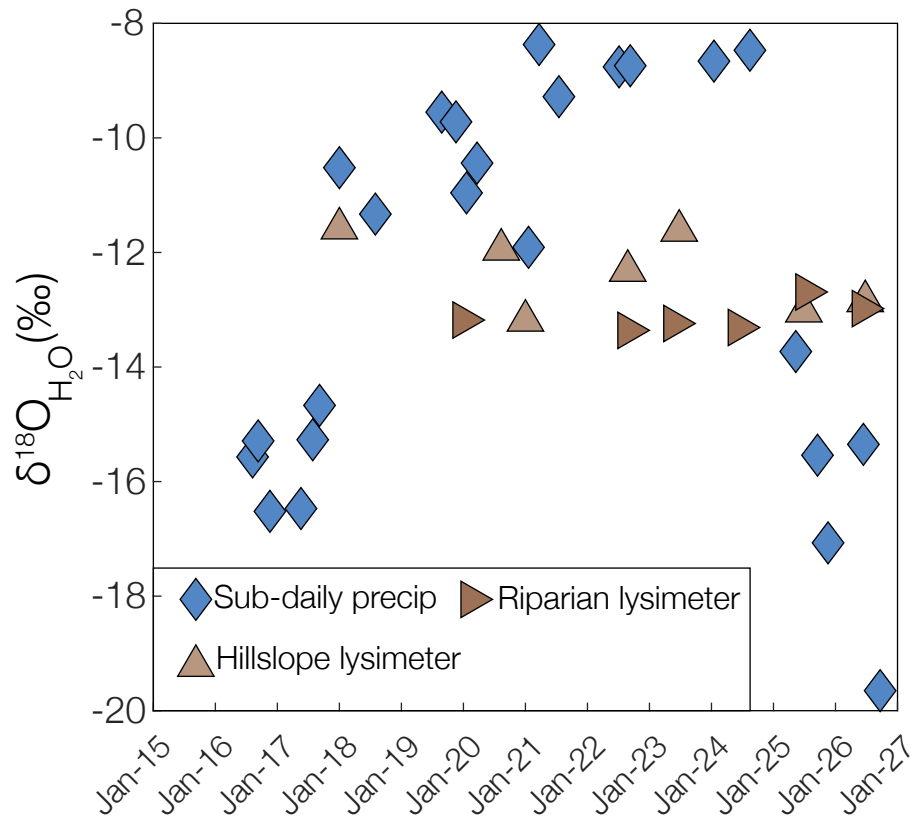

**Figure S4.** Precipitation and soil lysimeter water isotope ratios collected between 15 January 2017 and 27 January 2017 from a tropical montane cloud forested watershed in the southeastern Peruvian Andes mountains. Precipitation was collected in a bucket and sampled at least every 4 hours. Lysimeters were sampled daily or every few days.

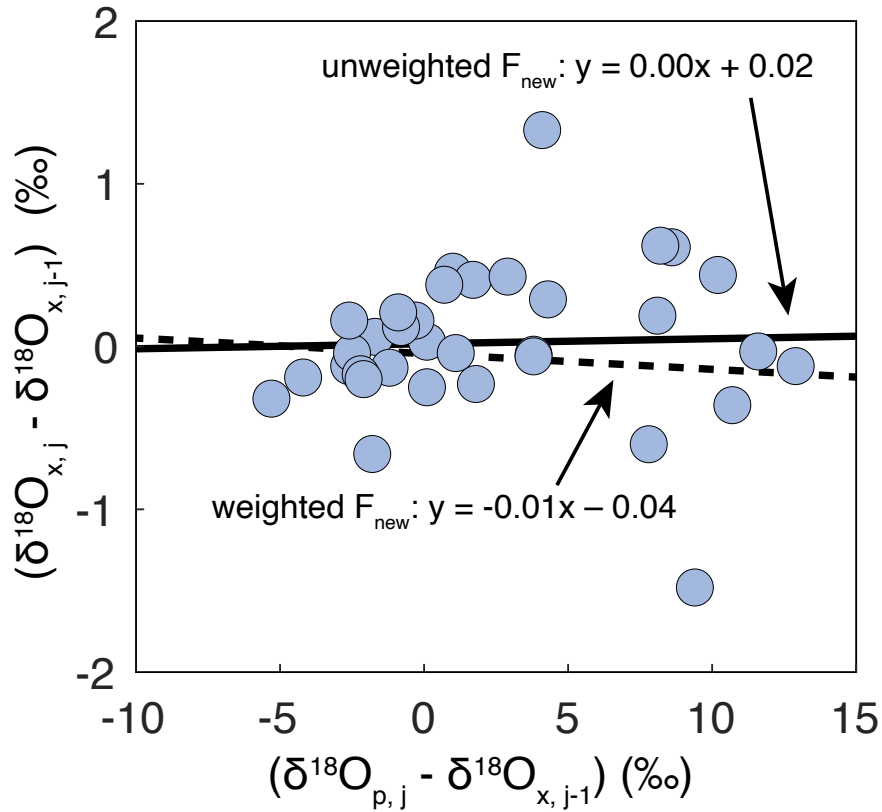

**Figure S5.** The fraction of new streamwater ( $F_{\text{new, stream}}$ ), as determined by the slope of the linear regression with (dashed line) and without (solid line) weighting for discharge. Without accounting for discharge, the unweighted  $F_{\text{new}}$  is 0.0 %. When accounting for discharge, the weighted  $F_{\text{new}}$  is -1.0 %. Linear regression indicates that neither slope significantly differs from zero ( $p > 0.05$ ).
